# Supplementary material for: Long insert whole genome sequencing for copy number variant and translocation detection
Source: PubMed Central journal article supplement (PMC3902897; doi:10.1093/nar/gkt865), 2013-09-25

**Supplementary Table 1.**

All CNVs ( $|\log_2 \text{ratio}| > 0.75$ ) identified across all patients and library types are listed.

| Patient | Library | Location                   | Log2 ratio |
|---------|---------|----------------------------|------------|
| 1       | SI      | chr1: 148638400-149778300  | -1.275     |
| 1       | SI      | chr7: 150580200-151116800  | -1.234     |
| 1       | SI      | chr19: 358300-8783100      | -1.234     |
| 1       | SI      | chr2: 241558600-242208800  | -1.127     |
| 1       | SI      | chr16: 88359000-89200400   | -1.127     |
| 1       | SI      | chr11: 2745200-2990200     | -1.012     |
| 1       | SI      | chr12: 34406300-34563100   | -1.012     |
| 1       | SI      | chr6: 84592400-84814000    | -0.918     |
| 1       | SI      | chr8: 141483200-141684000  | -0.918     |
| 1       | SI      | chr3: 48536000-48729700    | -0.905     |
| 1       | SI      | chr3: 50305600-50621800    | -0.905     |
| 1       | SI      | chr3: 52785200-52932200    | -0.905     |
| 1       | SI      | chr8: 21559500-21749000    | -0.905     |
| 1       | SI      | chr8: 22507800-22612300    | -0.905     |
| 1       | SI      | chr8: 46951300-47281400    | -0.905     |
| 1       | SI      | chr8: 126349400-126794700  | -0.905     |
| 1       | SI      | chr8: 144194000-145920600  | -0.905     |
| 1       | SI      | chr12: 132864800-133397100 | -0.905     |
| 1       | SI      | chr2: 218784800-218832300  | -0.819     |
| 1       | SI      | chr3: 51996100-52507500    | -0.819     |
| 1       | SI      | chr8: 1415600-2095400      | -0.819     |
| 1       | SI      | chr8: 21933200-22201500    | -0.819     |
| 1       | SI      | chr8: 23060000-23692200    | -0.819     |
| 1       | SI      | chr8: 38276300-38441900    | -0.819     |
| 1       | SI      | chr8: 70884500-71036600    | -0.819     |
| 1       | SI      | chr8: 140574400-141060100  | -0.819     |
| 1       | SI      | chr9: 127157700-127200500  | -0.819     |
| 1       | SI      | chr9: 129332200-129544300  | -0.819     |
| 1       | SI      | chr9: 133827500-133983900  | -0.819     |
| 1       | SI      | chr9: 136216500-137456500  | -0.819     |
| 1       | SI      | chr10: 74007900-74184600   | -0.819     |
| 1       | SI      | chr10: 80812700-80997300   | -0.819     |

|   |    |                            |        |
|---|----|----------------------------|--------|
| 1 | SI | chr10: 103787000-104009400 | -0.819 |
| 1 | SI | chr12: 124722800-126026200 | -0.819 |
| 1 | SI | chr16: 87602700-87918900   | -0.819 |
| 1 | SI | chr18: 11700-153900        | -0.819 |
| 1 | SI | chr22: 30055000-30229500   | -0.819 |
| 1 | SI | chr1: 798600-3766500       | -0.789 |
| 1 | SI | chr3: 46941200-47020000    | -0.789 |
| 1 | SI | chr3: 126649200-126839900  | -0.789 |
| 1 | SI | chr9: 130528800-131209000  | -0.789 |
| 1 | SI | chr9: 137928600-140766000  | -0.789 |
| 1 | SI | chr10: 88352200-88550400   | -0.789 |
| 1 | SI | chr12: 56035700-57163000   | -0.789 |
| 1 | SI | chr12: 56035700-57163000   | -0.789 |
| 1 | SI | chr12: 130879100-131211800 | -0.789 |
| 1 | SI | chr15: 25381700-25399200   | -0.789 |
| 1 | SI | chr17: 4327500-4985600     | -0.789 |
| 1 | LI | chr6: 84606600-84806100    | -0.98  |
| 1 | LI | chr8: 143513900-143712200  | -0.803 |
| 1 | LI | chr17: 80832100-80084000   | -0.803 |
| 1 | LI | chr8: 145613600-145709200  | -0.791 |
| 2 | SI | chr2: 89563000-91640400    | -0.84  |
| 2 | SI | chr8: 39175800-39408300    | -0.755 |
| 3 | LI | chr3: 186450400-187448100  | -0.912 |
| 3 | LI | chr16: 33842100-34871800   | -0.764 |

**Supplementary Table 2. Derivative log ratio spread (DLRS) analysis**

DLRS was calculated for SI and LI data sets as well as for exome validation data for each patient. SI and LI analyses were performed on normalized bam's.

|      | Patient 1 |       |       | Patient 2 |       |        | Patient 3 |       |       |
|------|-----------|-------|-------|-----------|-------|--------|-----------|-------|-------|
|      | SI        | LI    | Exome | SI        | LI    | Exome  | SI        | LI    | Exome |
| DLRS | 0.117     | 0.096 | 0.142 | 0.084     | 0.082 | 0.1226 | 0.083     | 0.078 | 0.108 |

**Supplementary Table 3. Exome sequencing metrics & CNV detection**

Exome sequencing was performed on the same tumor/normal pairs that were whole genome sequenced for each patient to validate CNVs.

|                                     | Patient 1 |          | Patient 2 |           | Patient 3 |           |
|-------------------------------------|-----------|----------|-----------|-----------|-----------|-----------|
| Total amount of data generated (GB) | 13.3      |          | 27.6      |           | 29.2      |           |
| Q30 data generated (GB)             | 11.1      |          | 24.8      |           | 23.1      |           |
| Read length                         | 2x101     |          | 2x101     |           | 2x101     |           |
| Total #reads                        | 125473318 |          | 224890888 |           | 301471184 |           |
|                                     | Normal    | Tumor    | Normal    | Tumor     | Normal    | Tumor     |
| Total #mapped reads                 | 53899773  | 67064679 | 168269051 | 152581663 | 149798936 | 143945852 |
| %mapped reads                       | 96.28     | 96.51    | 98.8      | 98.7      | 97.18     | 97.7      |
| Average target coverage             | 59.57     | 75.04    | 143.20    | 113.96    | 152.30    | 171.20    |
| # CNVs identified                   | 4         |          | 0         |           | 0         |           |

**Supplementary Table 4. CNVs identified in exome sequencing data**

2 of 4 genic CNVs identified in exome data overlap with CNVs identified in patient 1 LI data. CNV locations for LI and SI data are shown. Y=yes, N=no

| Patient | Log2 ratio | Location                | In whole genome data?           |
|---------|------------|-------------------------|---------------------------------|
| 1       | 0.792      | chr9:15433600-17332500  | N                               |
| 1       | -0.850     | chr17:79517200-80048500 | Y (LI; chr17:80832100-80084000) |
| 1       | -1.286     | chr19:7869-3633300      | Y (SI; chr19:358300-8783100)    |
| 1       | -0.816     | chr19:4268500-4860000   | N                               |

**Supplementary Figure 1. Comparison of sequencing required to achieve a target physical coverage**

*A priori* analyses were performed to compare the number of reads required using SI (300bp) or LI (900bp) libraries to achieve a target physical coverage.

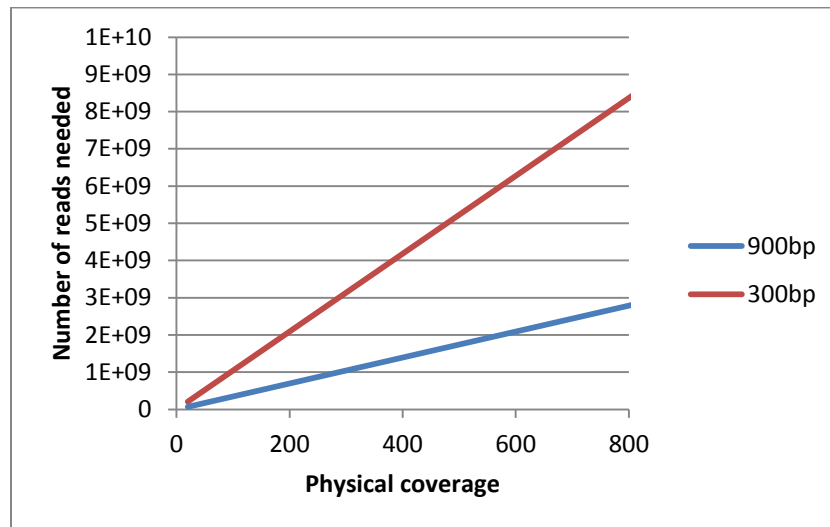

## Supplementary Figure 2. Copy number analysis

Copy number change plots are shown for both SI-WGS and LI-WGS normalized data for each of 3 patients: (A) patient 1 SI-WGS, (B) patient 1 LI-WGS, (C) patient 2 SI-WGS, (D) patient 2 LI-WGS, (E) patient 3 SI-WGS, (F) patient 3 LI-WGS. Results are organized by chromosome. Red demarcates indicate copy number gains and green demarcates copy number losses ( $|\log_2 \text{ratio}| > 0.75$ ).

A) Patient 1 SI-WGS

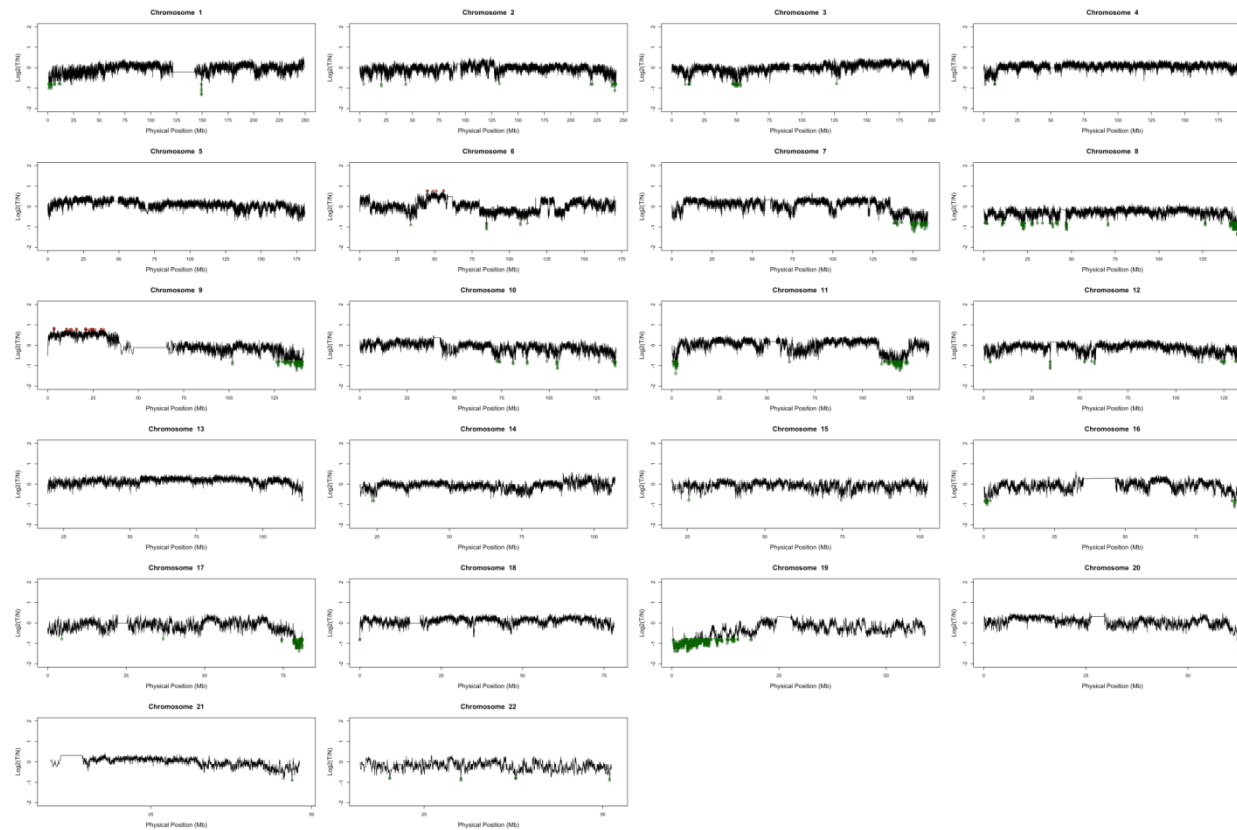

B) Patient 1 LI-WGS

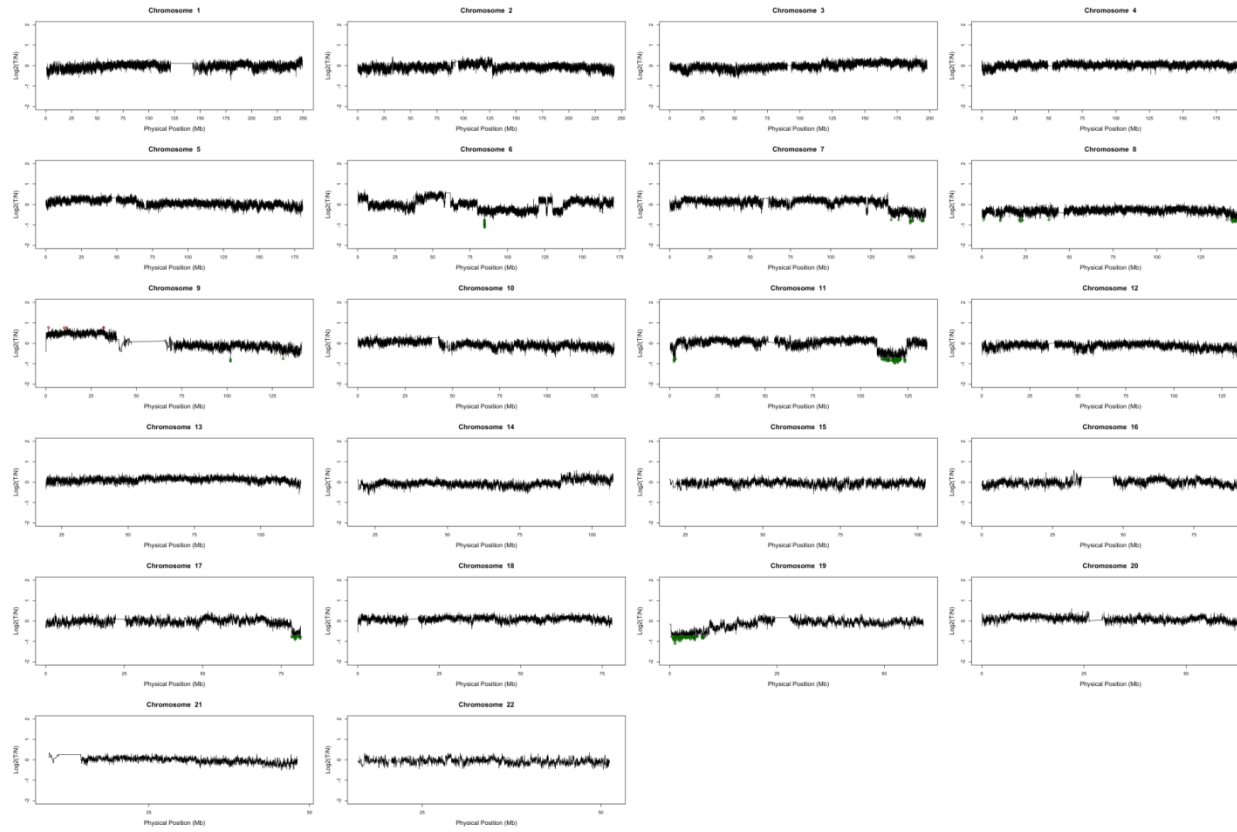

C) Patient 2 SI-WGS

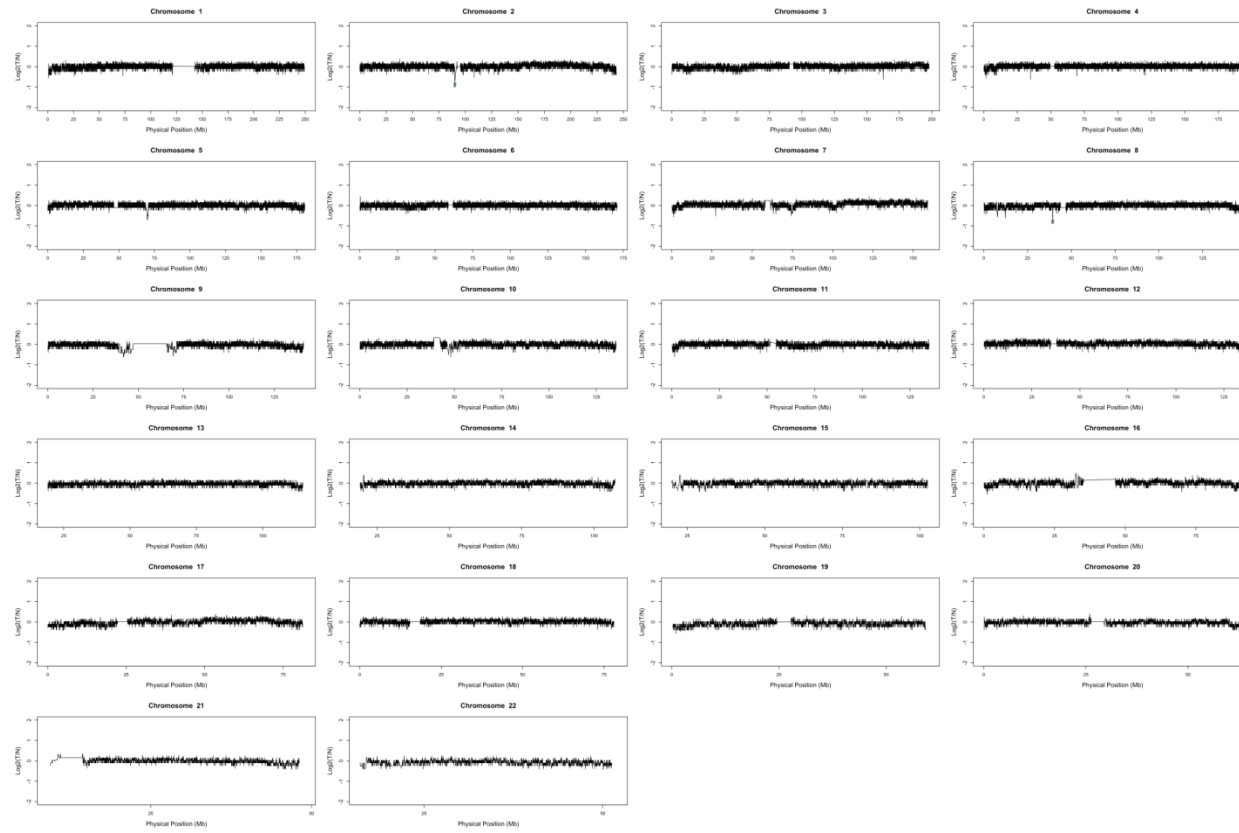

D) Patient 2 LI-WGS

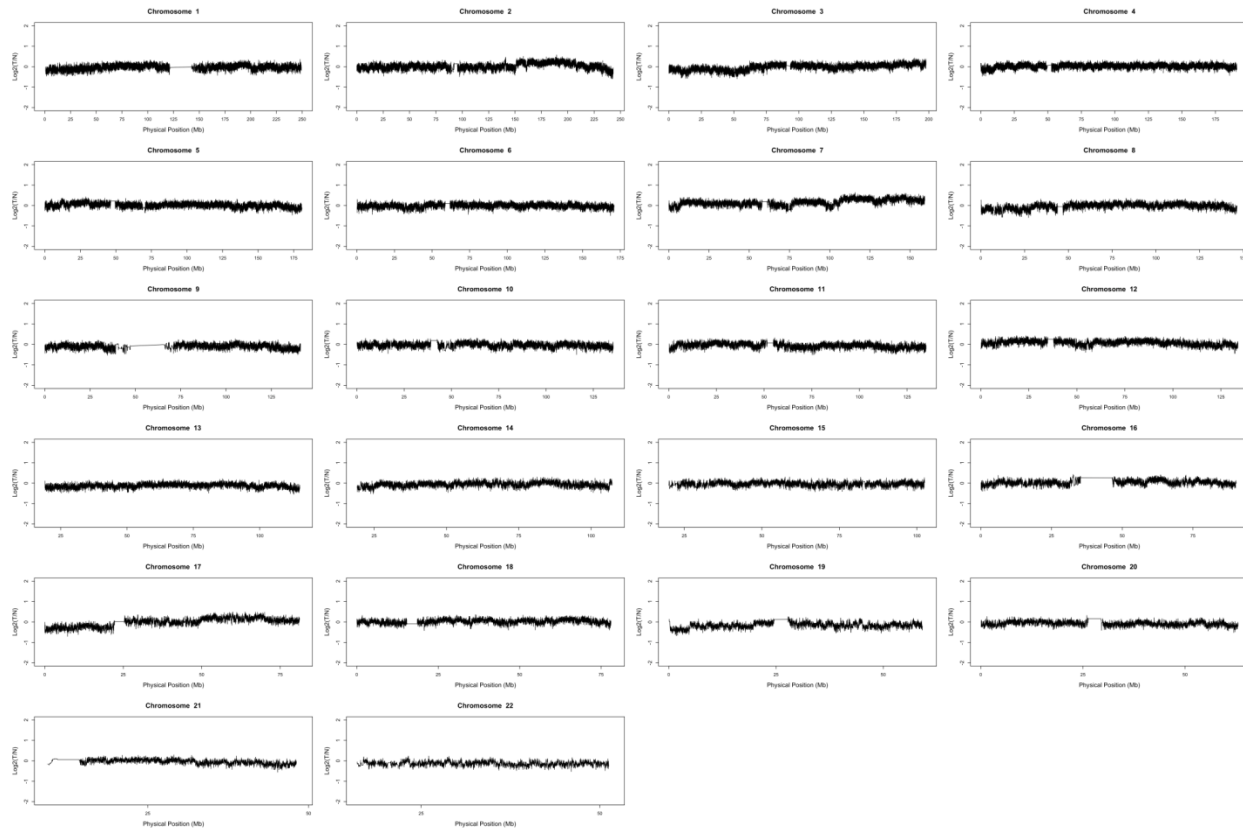

E) Patient 3 SI-WGS

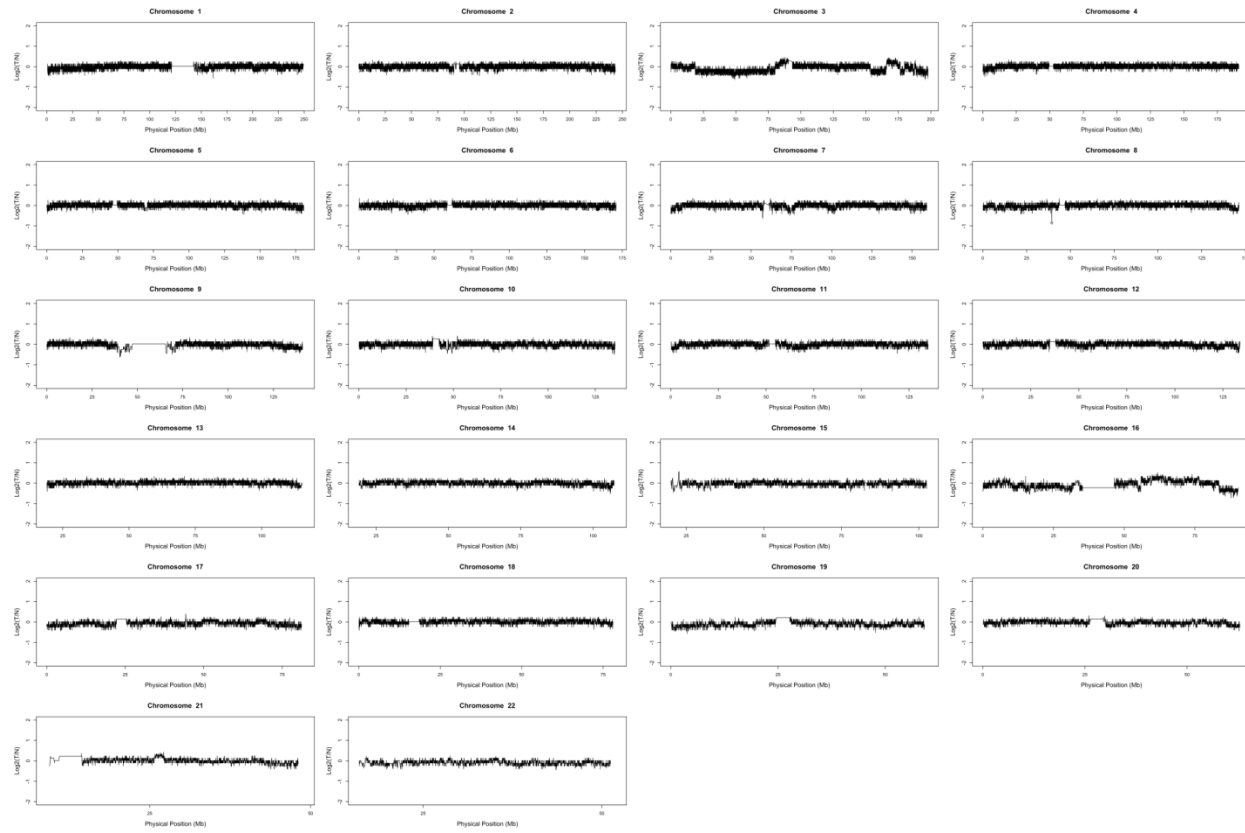



F) Patient 3 LI-WGS

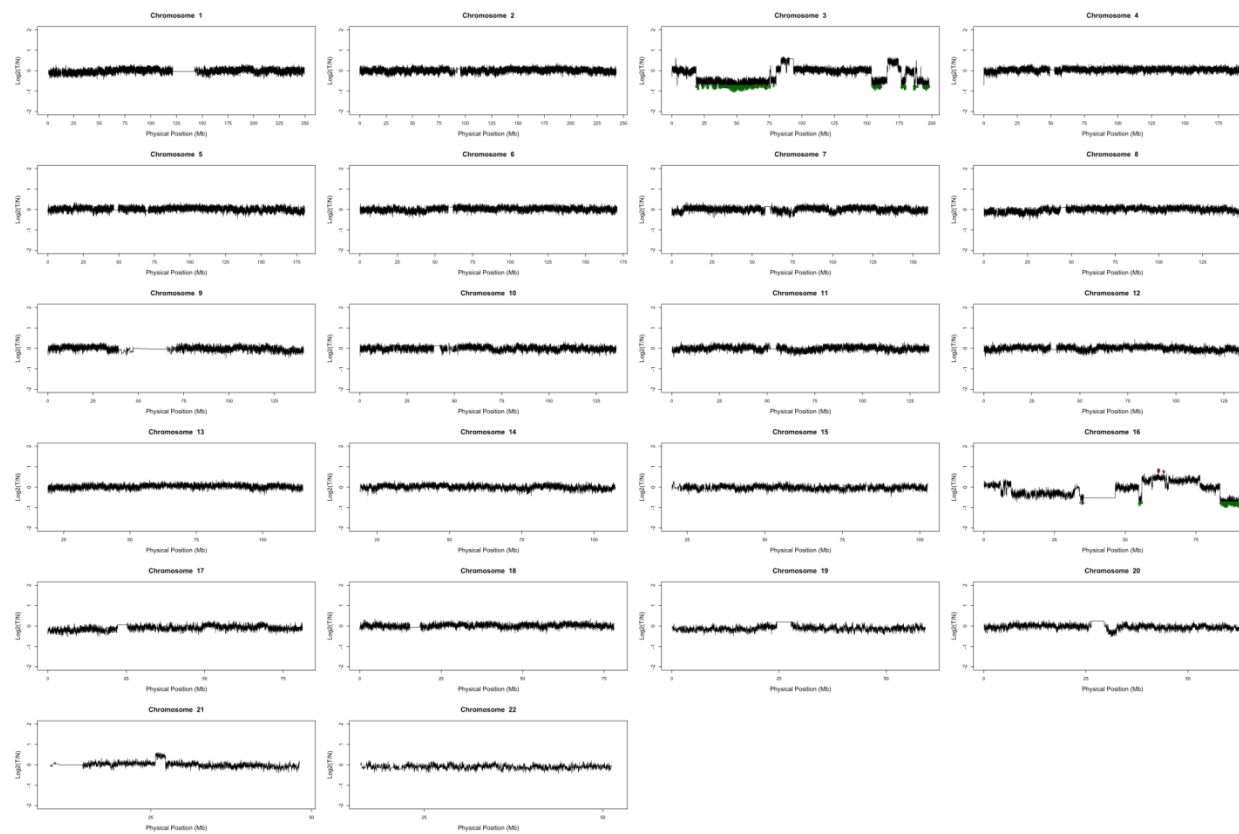

Supplement: supp_gkt865_nar-01794-met-g-2013-File006.pdf [file supp_gkt865_nar-01794-met-g-2013-File006.pdf]
